# Supplementary figures and images for: Genetic discontinuity in two high dispersal marine invertebrates in the northwest Atlantic
Source: Atypon-hosted journal article supplement (doi:10.1139/facets-2016-0044), 2017-01-01

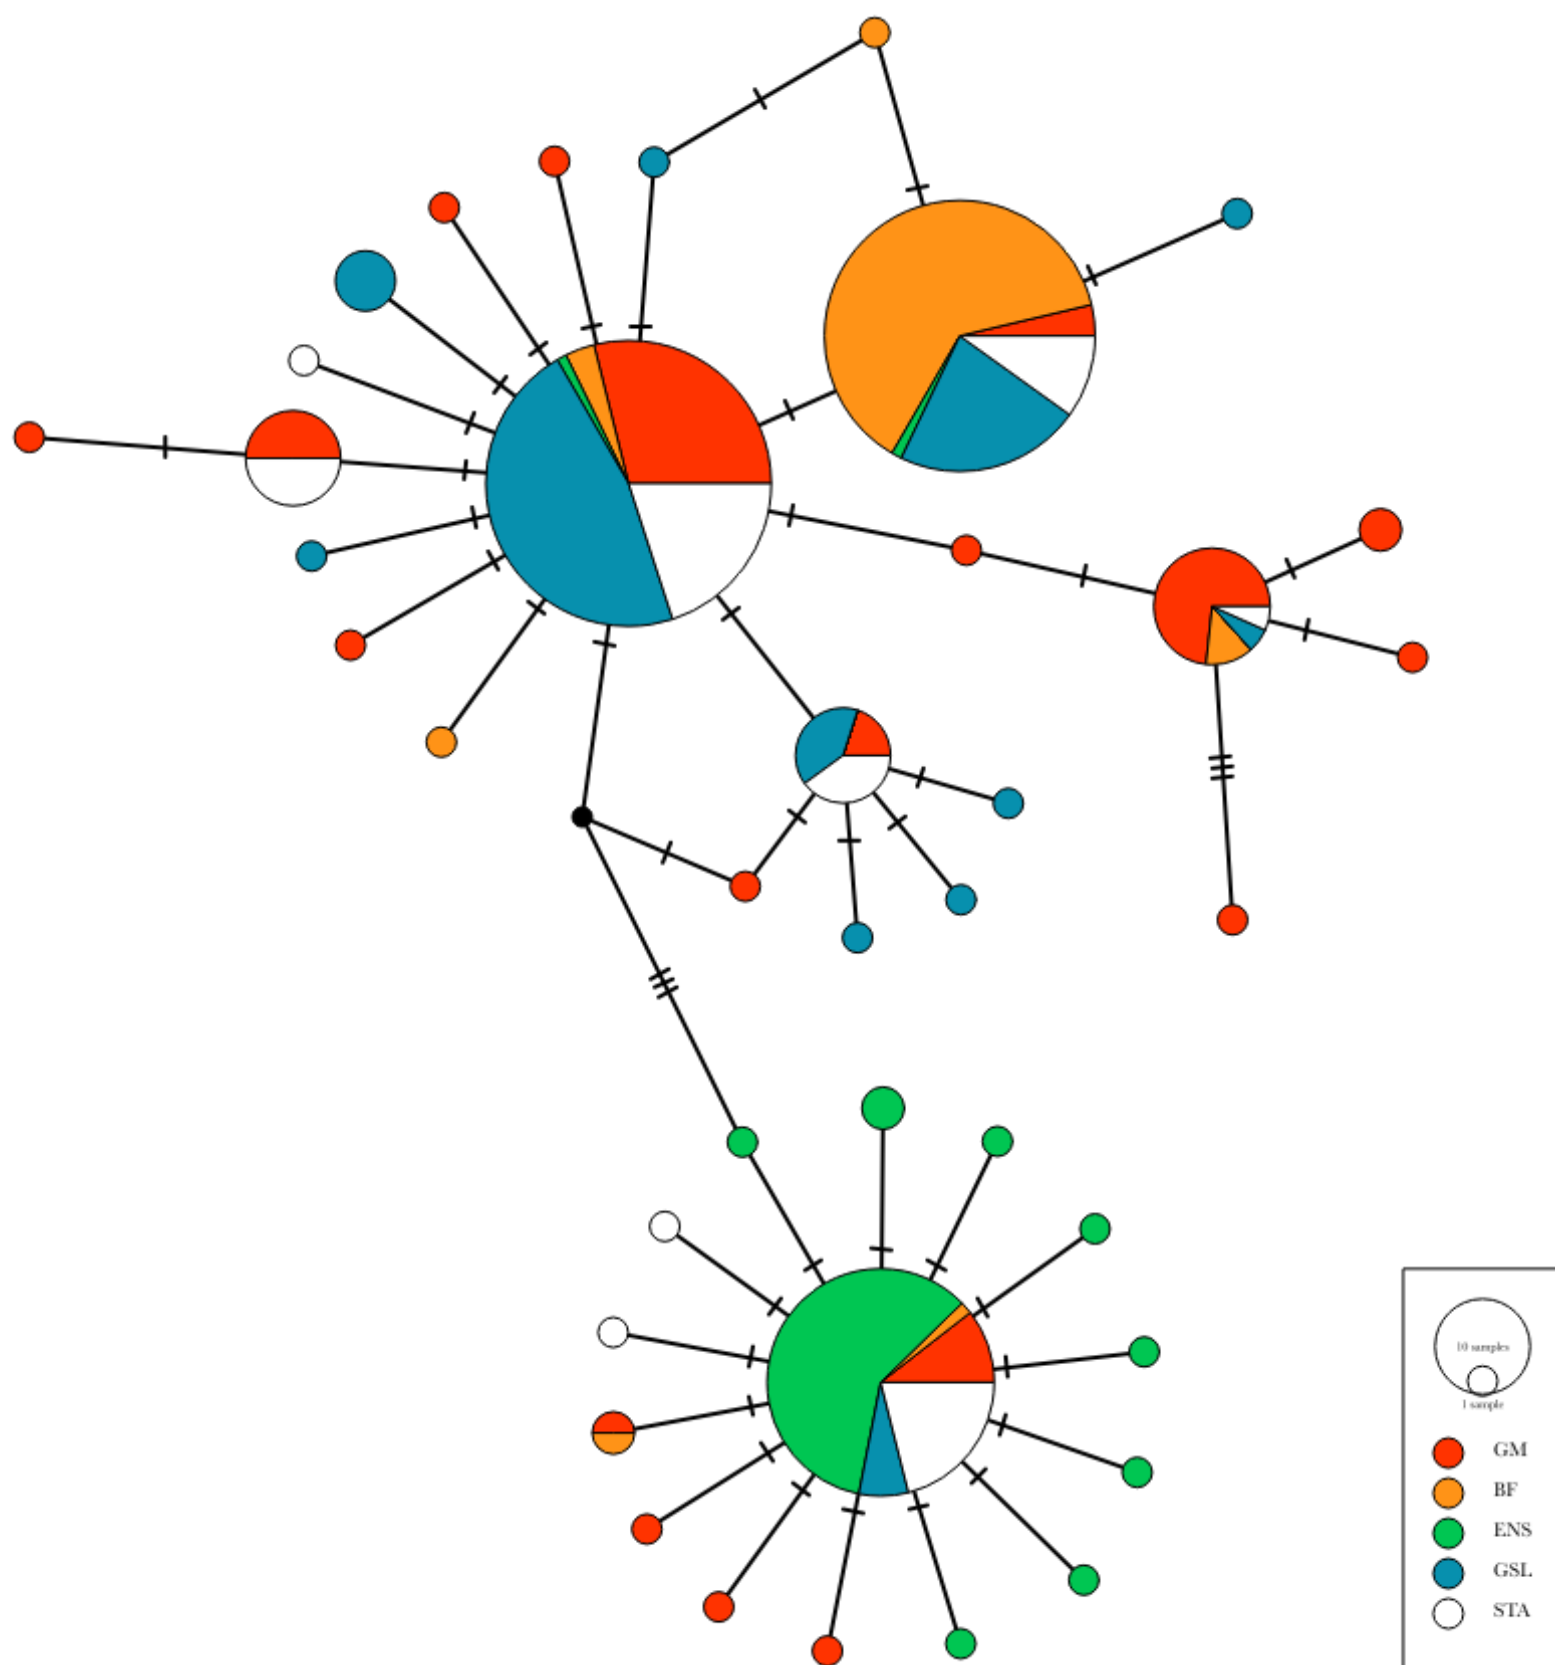

Supplement: facets-2016-0044_supplement1.pdf [file facets-2016-0044_supplement1.pdf]
